# Supplementary material for: Composites of Lignin-Based Biochar with BiOCl for Photocatalytic Water Treatment: RSM Studies for Process Optimization
Source: MDPI journal article supplement (doi:10.3390/nano13040735), 2023-02-15
Supplement: s1 [file s1]

## SUPPLEMENTARY INFORMATION

Article

# Composites of Lignin-Based Biochar with BiOCl for Photocatalytic Water Treatment: RSM Studies for Process Optimization

Amit Kumar Singh <sup>1</sup>, Dimitrios A. Giannakoudakis <sup>2,\*</sup>, Michael Arkas <sup>3</sup>, Konstantinos S. Triantafyllidis <sup>2,\*</sup>  
and Vaishakh Nair <sup>1,\*</sup>

<sup>1</sup> Department of Chemical Engineering, National Institute of Technology Karnataka (NITK), Surathkal, Mangalore 575025, India; i.amitsingh21@gmail.com

<sup>2</sup> Laboratory of Chemical and Environmental Technology, Department of Chemistry, Aristotle University of Thessaloniki, 54124 Thessaloniki, Greece

<sup>3</sup> Demokritos National Centre for Scientific Research, Institute of Nanoscience and Nanotechnology, 15310 Athens, Greece; m.arkas@inn.demokritos.gr

\* Correspondence: dagchem@gmail.com (D.A.G.); ktianta@chem.auth.gr (K.S.T.); vaishakhnair@nitk.edu.in (V.N.)

**Table S1.** Experimental results for the three independent factors.

| Run | Factors |    |   | MO degradation (%) |
|-----|---------|----|---|--------------------|
|     | A       | B  | C |                    |
| 1   | 1.5     | 50 | 5 | 96.16              |
| 2   | 0.5     | 30 | 7 | 53.68              |
| 3   | 1       | 30 | 5 | 100                |
| 4   | 0.5     | 50 | 5 | 30                 |
| 5   | 0.5     | 30 | 3 | 79.64              |
| 6   | 0.5     | 10 | 5 | 99.31              |
| 7   | 1.5     | 30 | 7 | 99.72              |
| 8   | 1       | 10 | 7 | 99.86              |
| 9   | 1.5     | 30 | 3 | 100                |
| 10  | 1       | 30 | 5 | 100                |
| 11  | 1       | 30 | 5 | 100                |
| 12  | 1       | 30 | 5 | 100                |
| 13  | 1       | 50 | 7 | 52.09              |
| 14  | 1       | 10 | 3 | 99.29              |
| 15  | 1       | 30 | 5 | 100                |
| 16  | 1.5     | 10 | 5 | 100                |
| 17  | 1       | 50 | 3 | 87.17              |

**Table S2.** ANOVA results of the model for removal of MO using 15BCPC.

| Source         | Sum of Squares | df | Mean Square | F-value | p-value  |             |
|----------------|----------------|----|-------------|---------|----------|-------------|
| Model          | 7479.35        | 9  | 831.04      | 190.40  | < 0.0001 | significant |
| A              | 2219.45        | 1  | 2219.45     | 508.50  | < 0.0001 |             |
| B              | 2212.46        | 1  | 2212.46     | 506.90  | < 0.0001 |             |
| C              | 461.32         | 1  | 461.32      | 105.69  | < 0.0001 |             |
| AB             | 1071.58        | 1  | 1071.58     | 245.51  | < 0.0001 |             |
| AC             | 164.87         | 1  | 164.87      | 37.77   | 0.0005   |             |
| BC             | 317.73         | 1  | 317.73      | 72.80   | < 0.0001 |             |
| A <sup>2</sup> | 420.00         | 1  | 420.00      | 96.23   | < 0.0001 |             |
| B <sup>2</sup> | 314.68         | 1  | 314.68      | 72.10   | < 0.0001 |             |
| C <sup>2</sup> | 191.98         | 1  | 191.98      | 43.99   | 0.0003   |             |
| Residual       | 30.55          | 7  | 4.36        |         |          |             |
| Lack of Fit    | 30.55          | 3  | 10.18       |         |          |             |
| Pure Error     | 0.0000         | 4  | 0.0000      |         |          |             |
| Cor Total      | 7509.90        | 16 |             |         |          |             |
